# Supplementary material for: A Year-Long Measurement and Source Contributions of Volatile Organic Compounds in Nanning, South China
Source: MDPI journal article supplement (doi:10.3390/atmos15050560), 2024-04-30
Supplement: s1 [file s1]

# Supplementary Materials: A Year-long Measurement and Source Contributions of Volatile Organic Compounds in a Less-developed City of China

Ying Wu <sup>1</sup>, Zhaoyu Mo <sup>1</sup>, Qinqin Wu <sup>2</sup>, Yongji Fan <sup>1</sup>, Xuemei Chen <sup>1</sup>, Hongjiao Li <sup>1</sup>, Hua Lin <sup>1</sup>, Xishou Huang <sup>1</sup>, Hualei Tang <sup>3</sup>, Donglan Liao <sup>3</sup>, Huilin Liu <sup>1\*</sup> and Ziwei Mo <sup>4\*</sup>

**Table S1.** The average concentration and standard deviation of each species.

| NO. | Species                    | Mean±SD(ppb) |
|-----|----------------------------|--------------|
| 1   | Propane                    | 3.750±3.580  |
| 2   | Ethane                     | 3.156±1.963  |
| 3   | Ethanol                    | 2.840±7.098  |
| 4   | Butane                     | 2.102±1.760  |
| 5   | Acetone                    | 1.715±1.436  |
| 6   | Ethylene                   | 1.450±0.900  |
| 7   | Acetylene                  | 1.383±0.784  |
| 8   | Isobutane                  | 1.119±0.960  |
| 9   | Isopentane                 | 0.925±0.617  |
| 10  | Isopropyl Alcohol          | 0.742±0.946  |
| 11  | Methylene dichloride       | 0.608±0.639  |
| 12  | Dichlorodifluoromethane    | 0.510±0.249  |
| 13  | 2-Butanone                 | 0.421±0.265  |
| 14  | Pentane                    | 0.381±0.232  |
| 15  | Benzene                    | 0.377±0.273  |
| 16  | Toluene                    | 0.356±0.321  |
| 17  | M/p-Xylene                 | 0.333±0.311  |
| 18  | Propene                    | 0.282±0.183  |
| 19  | 2-Propenal                 | 0.189±0.292  |
| 20  | Isoprene                   | 0.189±0.183  |
| 21  | Trichloromonofluoromethane | 0.181±0.054  |
| 22  | 1,2-dichloroethane         | 0.179±0.170  |
| 23  | methyl tert-butyl ether    | 0.179±0.235  |
| 24  | ethenyl ethanoate          | 0.173±0.113  |
| 25  | 1,4-Dioxane                | 0.148±0.170  |
| 26  | 1,2-Dichloropropane        | 0.123±0.083  |
| 27  | 2,3-Dimethylbutane         | 0.123±0.115  |
| 28  | 1,3-Butadiene              | 0.121±0.058  |
| 29  | o-Xylene                   | 0.119±0.153  |
| 30  | Ethyl Acetate              | 0.118±0.074  |
| 31  | Ethylbenzene               | 0.114±0.204  |
| 32  | n-Hexane                   | 0.108±0.083  |

|    |                                |             |
|----|--------------------------------|-------------|
| 33 | 2-Methylpentan                 | 0.104±0.094 |
| 34 | 2-Methylhexane                 | 0.093±0.128 |
| 35 | 2,3-Dimethylpentane            | 0.081±0.091 |
| 36 | 3-Methylpentane                | 0.068±0.048 |
| 37 | Methyl Isobutyl Ketone         | 0.060±0.141 |
| 38 | Naphthalene                    | 0.057±0.064 |
| 39 | Benzyl chloride                | 0.057±0.051 |
| 40 | Carbon Tetrachloride           | 0.056±0.016 |
| 41 | 1-Butene                       | 0.056±0.039 |
| 42 | Trichloromethane               | 0.055±0.054 |
| 43 | Carbon disulfide               | 0.055±0.055 |
| 44 | 1,2,4-Trimethylbenzene         | 0.050±0.049 |
| 45 | Cyclohexane                    | 0.042±0.049 |
| 46 | Methylcyclopentane             | 0.040±0.040 |
| 47 | (Z)-2-Butene                   | 0.040±0.040 |
| 48 | 1,1,2-Trichlorotrifluoroethane | 0.040±0.039 |
| 49 | Dodecane                       | 0.036±0.035 |
| 50 | (Z)-1,3-dichloropropene        | 0.034±0.033 |
| 51 | 1-hexene                       | 0.033±0.032 |
| 52 | 1-ethyl-3-methyl-Benzene       | 0.029±0.028 |
| 53 | Cyclopentane                   | 0.029±0.029 |
| 54 | 4-Ethyltoluene                 | 0.028±0.027 |
| 55 | Styrene                        | 0.028±0.027 |
| 56 | 2,4-Dimethylpentane            | 0.028±0.028 |
| 57 | n-Hendecane                    | 0.027±0.026 |
| 58 | Chloromethane                  | 0.026±0.026 |
| 59 | (E)-2-Butene                   | 0.026±0.026 |
| 60 | (E)- 2-Pentene                 | 0.024±0.024 |
| 61 | 2,2,4-Trimethylpentane         | 0.023±0.022 |
| 62 | 2-Hexanone                     | 0.023±0.022 |
| 63 | 3-Methylhexane                 | 0.022±0.021 |
| 64 | 1-Pentene                      | 0.022±0.022 |
| 65 | Tetrahydrofuran                | 0.020±0.020 |
| 66 | Heptane                        | 0.020±0.019 |
| 67 | Decylcyclohexane               | 0.019±0.018 |
| 68 | 1,3,5-Trimethylbenzene         | 0.018±0.018 |
| 69 | n-propylbenzene                | 0.017±0.017 |
| 70 | Chloroethylene                 | 0.017±0.017 |
| 71 | Chlorobenzene                  | 0.017±0.017 |
| 72 | 1-ethyl-2-methyl-Benzene       | 0.017±0.016 |
| 73 | 1,4-diethylbenzene             | 0.016±0.015 |
| 74 | Chloroethane                   | 0.016±0.016 |

|     |                               |             |
|-----|-------------------------------|-------------|
| 75  | (Z)-2-Pentene                 | 0.016±0.016 |
| 76  | 1,2,3-trimethylbenzene        | 0.016±0.016 |
| 77  | 1,3-diethylbenzene            | 0.015±0.014 |
| 78  | Nonane                        | 0.015±0.014 |
| 79  | 1,2-difluorotetrachloroethane | 0.014±0.013 |
| 80  | 1,2,4-trichlorobenzene        | 0.014±0.013 |
| 81  | 2,2-dimethylbutane            | 0.013±0.012 |
| 82  | Methylcyclohexane             | 0.013±0.013 |
| 83  | Methylmethacrylate            | 0.013±0.013 |
| 84  | 1,1-dichloroethane            | 0.012±0.012 |
| 85  | trans-1,3-Dichloropropene     | 0.012±0.011 |
| 86  | Octane                        | 0.012±0.011 |
| 87  | (Z)-1,2-Dichloroethene        | 0.011±0.010 |
| 88  | Bromomethane                  | 0.010±0.010 |
| 89  | 3 - methylheptane             | 0.010±0.010 |
| 90  | 2 - methylheptane             | 0.010±0.010 |
| 91  | Tetrachloroethylene           | 0.010±0.009 |
| 92  | 1,4-dichlorobenzene           | 0.009±0.009 |
| 93  | 1,3-dichlorobenzene           | 0.009±0.009 |
| 94  | Isopropylbenzene              | 0.008±0.007 |
| 95  | 2,3,4-trimethylpentane        | 0.007±0.006 |
| 96  | Hexachlorobutadiene           | 0.006±0.005 |
| 97  | 1,2-dichlorobenzene           | 0.006±0.005 |
| 98  | 1,1,2,2-tetrachloroethane     | 0.003±0.002 |
| 99  | 1,1,2-trichloroethane         | 0.003±0.002 |
| 100 | Trichloroethylene             | 0.003±0.003 |
| 101 | 1,1-dichloroethylene          | 0.003±0.003 |
| 102 | Bromodichloromethane          | 0.002±0.001 |
| 103 | Dibromochloromethane          | 0.002±0.001 |
| 104 | Tribromomethane               | 0.002±0.002 |
| 105 | trans-1,2-Dichloroethylene    | 0.002±0.001 |
| 106 | 1,2-dibromoethane             | 0.001±0.001 |
| 107 | 1,1,1-trichloroethane         | 0.001±0.001 |

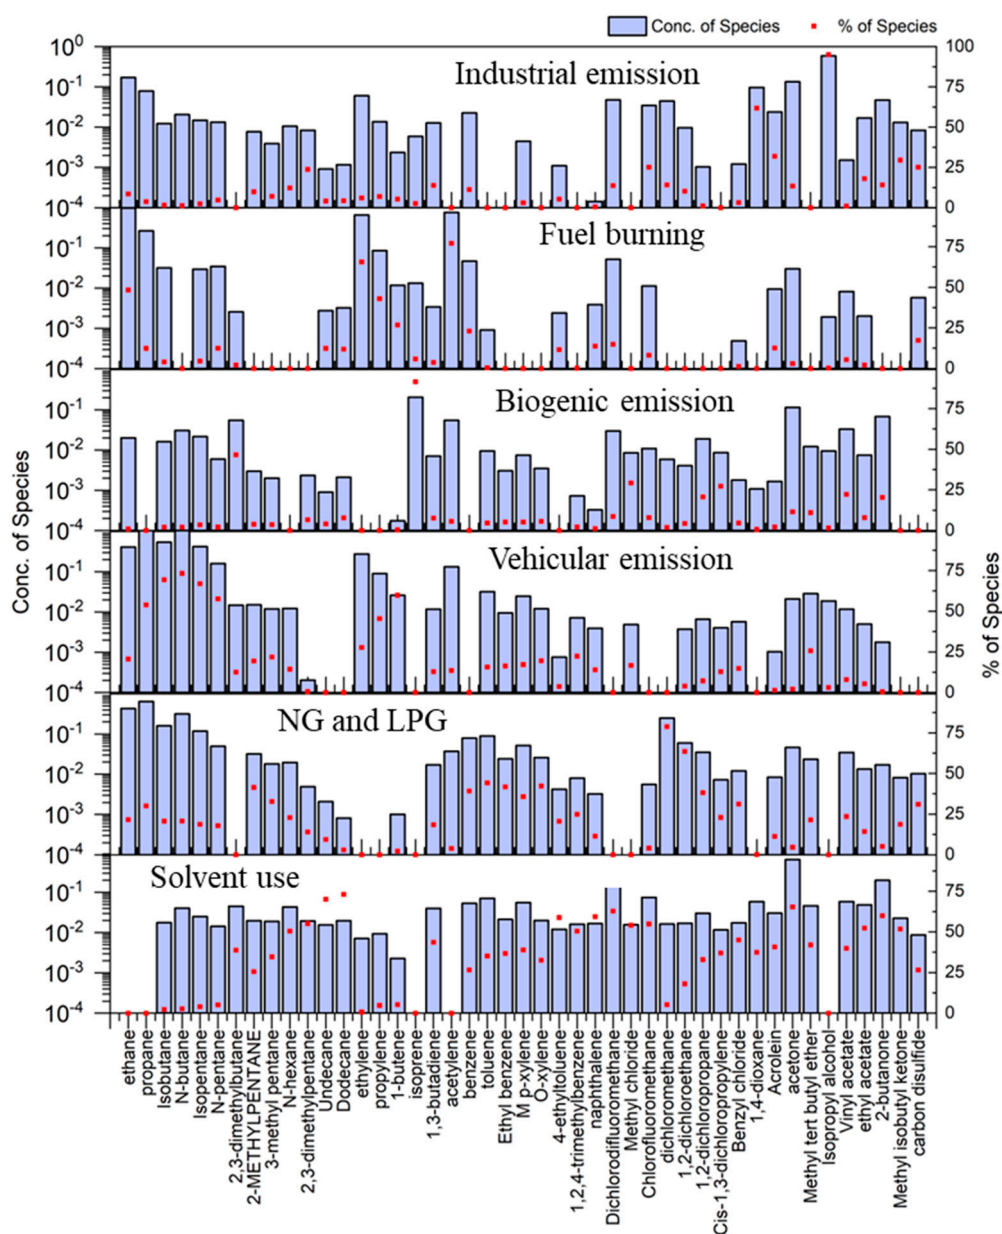

**Figure S1.** Concentration profiles and composition profiles of the six factors resolved from the PMF model.
